# Supplementary material for: Influence of Different Aggregation States on Volatile Organic Compounds Released by Dairy Kluyveromyces marxianus Strains
Source: MDPI journal article supplement (doi:10.3390/foods11182910), 2022-09-19
Supplement: s1 [file s1]

Supplementary Table S1. Main VOCs released by *K. marxianus* strains grown under different conditions

| Molecule                                          | M135 MATS    | M135 PLANK   | M135 BIOFILM-DETACHED | Odor and Flavor                                                             |
|---------------------------------------------------|--------------|--------------|-----------------------|-----------------------------------------------------------------------------|
| <b>Esters</b>                                     |              |              |                       |                                                                             |
| 2-methylbutyl acetate                             | 0.13 ± 0.01  | 0.07 ± 0.01  | N.d.                  | Sweet, fruity, banana, tropical, juicy                                      |
| 2-methylbutyl propanoate                          | 0.10 ± 0.02  | N.d.         | N.d.                  |                                                                             |
| 3-methylbutan-2-yl acetate                        | 0.89 ± 0.01  | N.d.         | N.d.                  |                                                                             |
| 3-methylbutyl acetate                             | 1.49 ± 0.04  | 0.77 ± 0.02  | N.d.                  | Sweet, fruity, banana                                                       |
| 3-methylbutyl propionate                          | 0.10 ± 0.01  | 0.05 ± 0.01  | N.d.                  | Sweet, pineapple, tropical fruit, apple, banana, fresh green, melon         |
| Acetic acid, isobutyl ester                       | N.d.         | 0.03 ± 0.01  | N.d.                  | Sweet, fruity, banana, tropical, apple                                      |
| Ethyl acetate                                     | 0.37 ± 0.01  | 1.42 ± 0.05  | N.d.                  | Fruity, sweet, weedy, green, with a grape and cherry nuance                 |
| Ethyl propionate                                  | N.d.         | 0.02 ± 0.01  | N.d.                  | Sweet, fruity, juicy, grape, pineapple, fermented, winey, bubble gum, apple |
| Phenethyl propionate                              | 0.01 ± 0.01  | 0.01 ± 0.01  | 0.11 ± 0.02           | Floral, rose, fruity, honey, balsamic, sweet, rose, tropical                |
| 2-phenylethyl acetate                             | 1.72 ± 0.03  | 10.58 ± 0.06 | 1.67 ± 0.05           | Floral, rose, sweet, honey, fruity, tropical, rose, green                   |
| <b>Total Esters</b>                               | <b>4.84</b>  | <b>12.97</b> | <b>1.78</b>           |                                                                             |
| <b>Alcohols</b>                                   |              |              |                       |                                                                             |
| Trans-farnesol                                    | N.d.         | N.d.         | 0.69 ± 0.02           | Muguet, floral, sweet, lily                                                 |
| (Z,E)-farnesol                                    | N.d.         | 0.01 ± 0.01  | N.d.                  | Delicate floral                                                             |
| 2-methylbutan-1-ol                                | 1.86 ± 0.05  | 0.96 ± 0.02  | N.d.                  | Roasted, winey, fruity, alcoholic                                           |
| 2-phenylethanol                                   | 1.45 ± 0.06  | 0.16 ± 0.02  | 6.47 ± 0.09           | Floral, rose, sweet, bready                                                 |
| 3-methylbutan-1-ol                                | 1.74 ± 0.05  | 0.90 ± 0.01  | N.d.                  | Alcoholic, pungent, cognac, fruity, banana, molasses, fermented,            |
| 6-methylpiperidin-3-ol                            | N.d.         | N.d.         | 0.58 ± 0.02           |                                                                             |
| Isobutanol                                        | 0.66 ± 0.02  | N.d.         | N.d.                  | Ethereal, winey, fusel, whiskey                                             |
| Pentan-1-ol                                       | 9.21 ± 0.06  | 4.74 ± 0.06  | N.d.                  | Fusel, oily, sweet, balsamic, pungent, fermented, bready, cereal, fruity    |
| <b>Total Alcohols</b>                             | <b>14.93</b> | <b>6.78</b>  | <b>7.75</b>           |                                                                             |
| <b>Ketons</b>                                     |              |              |                       |                                                                             |
| Methyl heptyl ketone                              | N.d.         | N.d.         | 0.31 ± 0.02           | Fruity, sweet, cheesy, herbal, coconut, fresh, dairy, buttery               |
| 8-hydroxyoctan-2-one                              | N.d.         | N.d.         | 1.13 ± 0.01           |                                                                             |
| <b>Total Ketons</b>                               | <b>N.d.</b>  | <b>N.d.</b>  | <b>1.45</b>           |                                                                             |
| <b>Organic acids</b>                              |              |              |                       |                                                                             |
| N-decanoic acid                                   | N.d.         | 0.01 ± 0.01  | N.d.                  | Rancid, sour, fatty, citrus, creamy, buttery, fruity, dairy                 |
| <b>Total Organic acids</b>                        | <b>N.d.</b>  | <b>0.01</b>  | <b>0</b>              |                                                                             |
| <b>Phenols</b>                                    |              |              |                       |                                                                             |
| 2,5-ditert-butylphenol                            | N.d.         | N.d.         | 1.56 ± 0.02           |                                                                             |
| <b>Total Phenols</b>                              | <b>N.d.</b>  | <b>N.d.</b>  | <b>1.56</b>           |                                                                             |
| <b>Terpenes</b>                                   |              |              |                       |                                                                             |
| α-springene                                       | 0.04 ± 0.01  | N.d.         | N.d.                  |                                                                             |
| α-farnesene                                       | N.d.         | 0.02 ± 0.01  | N.d.                  |                                                                             |
| <b>Total Terpenes</b>                             | <b>0.04</b>  | <b>0.02</b>  | <b>N.d.</b>           |                                                                             |
| Molecule                                          | 6M2 MATS     | 6M2 PLANK    | 6M2 BIOFILM-DETACHED  | Odor and Flavor                                                             |
| <b>Esters</b>                                     |              |              |                       |                                                                             |
| 2-methylbutyl acetate                             | 0.10 ± 0.01  | 0.16 ± 0.02  | N.d.                  | Sweet, fruity, banana, tropical, juicy                                      |
| 3-methylbutyl acetate                             | 1.09 ± 0.02  | 1.84 ± 0.02  | N.d.                  | Sweet, fruity, banana                                                       |
| Cinnamic acid, p-(trimethylsiloxy)-, methyl ester | N.d.         | 0.02 ± 0.01  | N.d.                  |                                                                             |
| Ethyl acetate                                     | 0.49 ± 0.02  | 2.22 ± 0.02  | N.d.                  | Fruity, sweet, weedy, green, with a grape and cherry nuance                 |
| Ethyl decanoate                                   | 3.09 ± 0.06  | 5.21 ± 0.07  | N.d.                  | Sweet, waxy, fruity, apple, grape, oily, brandy                             |
| Ethyl octanoate                                   | 0.18 ± 0.02  | 0.31 ± 0.01  | N.d.                  | Fruity, sweet, apricot, banana, pear, musty, pineapple, dairy, creamy       |
| Nerolidyl acetate                                 | 0.03 ± 0.01  | N.d.         | N.d.                  | Fresh, sweet, citrus, freesia, woody                                        |

|                            |                 |                  |                             |                                                                          |
|----------------------------|-----------------|------------------|-----------------------------|--------------------------------------------------------------------------|
| Pentan-2-yl decanoate      | 0.04 ± 0.01     | N.d.             | N.d.                        |                                                                          |
| Phenethyl propionate       | 0.01 ± 0.01     | N.d.             | N.d.                        | Floral, rose, fruity, honey, balsamic, sweet, rose, tropical             |
| 2-phenylethyl acetate      | 4.99 ± 0.06     | 4.78 ± 0.07      | 0.62 ± 0.04                 | Floral, rose, sweet, honey, fruity, tropical, green                      |
| <b>Total Esters</b>        | <b>10.04</b>    | <b>14.58</b>     | <b>0.628</b>                |                                                                          |
| <b>Alcohols</b>            |                 |                  |                             |                                                                          |
| (±)-2,3-dihydrofarnesol    | 0.07 ± 0.01     | N.d.             | N.d.                        | Floral, green, fruity                                                    |
| (2R)-2-aminopropan-1-ol    | 0.06 ± 0.02     | 0.01 ± 0.01      | N.d.                        |                                                                          |
| 2-methylbutan-1-ol         | 1.36 ± 0.05     | 2.29 ± 0.03      | N.d.                        | Roasted, winey, fruity, alcoholic                                        |
| 2-phenylethanol            | 0.28 ± 0.04     | 0.53 ± 0.01      | 11.28 ± 0.09                | Floral, rose, sweet, bready                                              |
| 3-methylbutan-1-ol         | 1.27 ± 0.05     | 2.15 ± 0.05      | N.d.                        | Alcoholic, pungent, cognac, fruity, banana, molasses, fermented          |
| 4-aminopentan-1-ol         | N.d.            | 0.04 ± 0.01      | N.d.                        |                                                                          |
| 4-butoxybutan-1-ol         | N.d.            | N.d.             | 0.29 ± 0.02                 |                                                                          |
| Pentan-1-ol                | 6.74 ± 0.07     | N.d.             | N.d.                        | Fusel, oily, sweet, balsamic, pungent, fermented, bready, cereal, fruity |
| Trans-farnesol             | N.d.            | N.d.             | 0.21 ± 0.01                 | Muguet, floral, sweet, lily                                              |
| <b>Total Alcohols</b>      | <b>9.80</b>     | <b>5.02</b>      | <b>11.78</b>                |                                                                          |
| <b>Ketons</b>              |                 |                  |                             |                                                                          |
| Methyl heptyl ketone       | N.d.            | N.d.             | 0.23 ± 0.02                 | Fruity, sweet, cheesy, herbal, coconut, fresh, dairy, buttery            |
| <b>Total Ketons</b>        | <b>N.d.</b>     | <b>N.d.</b>      | <b>0.23 ± 0.01</b>          |                                                                          |
| <b>Organic acids</b>       |                 |                  |                             |                                                                          |
| N-decanoic acid            | 0.02 ± 0.01     | N.d.             | N.d.                        | Rancid, sour, fatty, citrus, creamy, buttery, fruity, dairy              |
| <b>Total Organic acids</b> | <b>0.02</b>     | <b>N.d.</b>      | <b>N.d.</b>                 |                                                                          |
| <b>Phenols</b>             |                 |                  |                             |                                                                          |
| 2,5-ditert-butylphenol     | N.d.            | N.d.             | 0.79 ± 0.02                 |                                                                          |
| <b>Total Phenols</b>       | <b>N.d.</b>     | <b>N.d.</b>      | <b>0.79</b>                 |                                                                          |
| <b>Terpenes</b>            |                 |                  |                             |                                                                          |
| α-farnesene                | 0.06 ± 0.01     | N.d.             | N.d.                        |                                                                          |
| <b>Total Terpenes</b>      | <b>0.06</b>     | <b>N.d.</b>      | <b>N.d.</b>                 |                                                                          |
| <b>Molecule</b>            | <b>VG4 MATS</b> | <b>VG4 PLANK</b> | <b>VG4 BIOFILM-DETACHED</b> | <b>Odor and Flavor</b>                                                   |
| <b>Esters</b>              |                 |                  |                             |                                                                          |
| 3-methylbutyl acetate      | 1.25 ± 0.02     | 0.60 ± 0.01      | N.d.                        | Sweet, fruity, banana                                                    |
| Ethyl acetate              | 0.54 ± 0.02     | 0.69 ± 0.02      | N.d.                        | Fruity, sweet, weedy, green, with a grape and cherry nuance              |
| Ethyl decanoate            | 3.34 ± 0.07     | 1.69 ± 0.03      | N.d.                        | Sweet, waxy, fruity, apple, grape, oily, brandy                          |
| Ethyl dodecanoate          | 0.15 ± 0.02     | N.d.             | N.d.                        | Sweet, waxy, floral, soapy, clean, creamy, dairy, fruity                 |
| Ethyl octanoate            | 0.20 ± 0.01     | 0.10 ± 0.01      | N.d.                        | Fruity, sweet, apricot, banana, pear, musty, pineapple, dairy, creamy    |
| Nerolidyl acetate          | 0.06 ± 0.01     | N.d.             | N.d.                        | Fresh, sweet, citrus, freesia, woody                                     |
| Pentyl acetate             | N.d.            | 8.22 ± 0.09      | N.d.                        | Fruity, banana, pear, apple, sweet                                       |
| Phenethyl pivalate         | 0.03 ± 0.01     | N.d.             | 0.37 ± 0.01                 | Rose, spicy, geranium, blueberry, balsamic, grassy                       |
| 2-phenylethyl acetate      | 3.69 ± 0.06     | 3.15 ± 0.04      | 6.24 ± 0.06                 | Floral, rose, sweet, honey, fruity, tropical, green                      |
| <b>Total Esters</b>        | <b>9.29</b>     | <b>14.46</b>     | <b>6.62</b>                 |                                                                          |
| <b>Alcohols</b>            |                 |                  |                             |                                                                          |
| (2R)-2-aminopropan-1-ol    | 0.01 ± 0.01     | N.d.             | N.d.                        |                                                                          |
| (Z,E)-farnesol             | N.d.            | N.d.             | 0.18 ± 0.02                 | Delicate floral                                                          |
| 2-methylbutan-1-ol         | 1.47 ± 0.04     | 0.74 ± 0.02      | N.d.                        | Roasted, winey, fruity, alcoholic                                        |
| 2-phenylethanol            | 0.28 ± 0.01     | 0.27 ± 0.01      | 6.12 ± 0.09                 | Floral, rose, sweet, bready                                              |
| 3-methylbutan-1-ol         | 1.38 ± 0.03     | 0.70 ± 0.01      | N.d.                        | Alcoholic, pungent, cognac, fruity, banana, molasses, fermented,         |
| Pentan-1-ol                | 7.28 ± 0.09     | 3.69 ± 0.06      | N.d.                        | Fusel, oily, sweet, balsamic, pungent, fermented, bready, cereal, fruity |
| Trans-farnesol             | N.d.            | 0.02 ± 0.01      | N.d.                        | Muguet, floral, sweet, lily                                              |
| <b>Total Alcohols</b>      | <b>10.43</b>    | <b>5.43</b>      | <b>6.30</b>                 |                                                                          |

|                        |                          |                           |                                      |                                                                             |
|------------------------|--------------------------|---------------------------|--------------------------------------|-----------------------------------------------------------------------------|
| Ketons                 |                          |                           |                                      |                                                                             |
| Methyl heptyl ketone   | N.d.                     | N.d.                      | 0.19 ± 0.02                          | Fruity, sweet, cheesy, herbal, coconut, fresh, green, dairy, buttery        |
| 8-hydroxyoctan-2-one   | N.d.                     | N.d.                      | 0,92 ± 0.02                          |                                                                             |
| Total Ketons           | N.d.                     | N.d.                      | 1,11                                 |                                                                             |
| Organic acids          |                          |                           |                                      |                                                                             |
| N-decanoic acid        | 0,04 ± 0.01              | 0.01 ± 0.01               | N.d.                                 | Rancid, sour, fatty, citrus, creamy, buttery, fruity, dairy                 |
| Total Organic acids    | 0.04                     | 0.01                      | N.d.                                 |                                                                             |
| Phenols                |                          |                           |                                      |                                                                             |
| 2,5-ditert-butylphenol | N.d.                     | N.d.                      | 0.97 ± 0.02                          |                                                                             |
| Total Phenols          | N.d.                     | N.d.                      | 0.97                                 |                                                                             |
| Terpenes               |                          |                           |                                      |                                                                             |
| α-springene            | 0,06 ± 0.01              | N.d.                      | N.d.                                 |                                                                             |
| Total Terpenes         | 0.06                     | N.d.                      | N.d.                                 |                                                                             |
| Molecule               | CBS834 <sup>T</sup> MATS | CBS834 <sup>T</sup> PLANK | CBS834 <sup>T</sup> BIOFILM-DETACHED | Odor and Flavor                                                             |
| Esters                 |                          |                           |                                      |                                                                             |
| 2-methylbutyl acetate  | 0.26 ± 0.01              | N.d.                      | N.d.                                 | Sweet, fruity, banana, tropical, juicy                                      |
| 3-methylbutyl acetate  | 2.85 ± 0.05              | N.d.                      | N.d.                                 | Sweet, fruity, banana                                                       |
| Ethyl acetate          | 3.88 ± 0.06              | 4.50 ± 0.09               | N.d.                                 | Fruity, sweet, weedy, green, with a grape and cherry nuance                 |
| Ethyl decanoate        | N.d.                     | 4.70 ± 0.08               | N.d.                                 | Sweet, waxy, fruity, apple, grape, oily, brandy                             |
| Ethyl octanoate        | N.d.                     | 0.28 ± 0.04               | N.d.                                 | Fruity, sweet, apricot, banana, pear, musty, pineapple, dairy, creamy       |
| Ethyl propionate       | 0.08 ± 0.02              |                           | N.d.                                 | Sweet, fruity, juicy, grape, pineapple, fermented, winey, bubble gum, apple |
| Isopentyl acetate      | N.d.                     | 2.45 ± 0.06               | N.d.                                 | Sweet, fruity, banana, solvent, ripe, estery, green                         |
| Phenethyl isobutyrate  | N.d.                     | N.d.                      | 2.25 ± 0.06                          | Floral, fruity, rose, tea, peach, yeasty, balsamic, honey                   |
| Phenethyl pivalate     | N.d.                     | 0.04 ± 0.01               | 0.19 ± 0.01                          | Rose, spicy, geranium, blueberry, balsamic, grassy                          |
| 2-phenylethyl acetate  | 3.88 ± 0.09              | 1.91 ± 0.05               | 0.16 ± 0.03                          | Floral, rose, sweet, honey, fruity, tropical, green                         |
| Total Esters           | 10.97                    | 14.06                     | 2.62                                 |                                                                             |
| Alcohols               |                          |                           |                                      |                                                                             |
| 2-methylbutan-1-ol     | 3.55 ± 0.02              | 2.07 ± 0.06               | N.d.                                 | Roasted, winey, fruity, alcoholic                                           |
| 2-phenylethanol        | 1.48 ± 0.01              | 0.78 ± 0.04               | 11.45 ± 0.09                         | Floral, rose, sweet, bready                                                 |
| 3-methylbutan-1-ol     | 3.32 ± 0.03              | 1.94 ± 0.06               | N.d.                                 | Alcoholic, pungent, cognac, fruity, banana, molasses, fermented             |
| 4-aminopentan-1-ol     | N.d.                     | 0.05 ± 0.01               | N.d.                                 | Ethereal, winey, fusel, whiskey                                             |
| Isobutanol             | N.d.                     | 0.73 ± 0.02               | N.d.                                 |                                                                             |
| Total Alcohols         | 8.36                     | 5.58                      | 11.45                                |                                                                             |
| Ketons                 |                          |                           |                                      |                                                                             |
| Methyl heptyl ketone   | N.d.                     | N.d.                      | 0.10 ±0.01                           | Fruity, sweet, cheesy, herbal, coconut, fresh, green, dairy, buttery        |
| 8-hydroxyoctan-2-one   | N.d.                     | N.d.                      | 0.55 ± 0.02                          |                                                                             |
| Total Ketons           | N.d.                     | N.d.                      | 0.66                                 |                                                                             |
| Organic acids          |                          |                           |                                      |                                                                             |
| N-decanoic acid        | N.d.                     | 0,08 ± 0.01               | N.d.                                 | Rancid, sour, fatty, citrus, creamy, buttery, fruity, dairy                 |
| Total Organic acids    | N.d.                     | 0,08                      | N.d.                                 |                                                                             |
| Phenols                |                          |                           |                                      |                                                                             |
| 2,5-ditert-butylphenol | N.d.                     | N.d.                      | 0.44 ± 0.02                          |                                                                             |
| Total Phenols          | N.d.                     | N.d.                      | 0.44                                 |                                                                             |
|                        | FM09 MATS                | FM09 PLANK                | FM09 BIOFILM-DETACHED                | Odor and Flavor                                                             |
| Esters                 |                          |                           |                                      |                                                                             |
| 2-methylbutyl acetate  | 0.06 ± 0.02              |                           | N.d.                                 | Sweet, fruity, banana, tropical, juicy                                      |
| 3-methylbutyl acetate  | 0.67 ± 0.01              | 0.58 ± 0.02               | N.d.                                 | Sweet, fruity, banana                                                       |
| Ethyl acetate          | 0.17 ± 0.01              | 0.92 ± 0.03               | N.d.                                 | Fruity, sweet, weedy, green, with a grape and cherry nuance                 |

|                       |              |              |             |                                                                       |
|-----------------------|--------------|--------------|-------------|-----------------------------------------------------------------------|
| Ethyl decanoate       | N.d.         | 1.66 ± 0.05  | N.d.        | Sweet, waxy, fruity, apple, grape, oily, brandy                       |
| Ethyl octanoate       | N.d.         | 0.10 ± 0.01  | N.d.        | Fruity, sweet, apricot, banana, pear, musty, pineapple, dairy, creamy |
| Pentyl acetate        | 9.27 ± 0.05  | 8.05 ± 0.06  | N.d.        | Fruity, banana, pear, apple, sweet                                    |
| Pentyl propionate     | 0.09 ± 0.02  | N.d.         | N.d.        | Sweet, fruity, apricot, pineapple, apple, banana                      |
| Phenethyl propionate  | 0.01 ± 0.01  | 0.01 ± 0.01  | 0.06 ± 0.01 | Floral, rose, fruity, honey, balsamic, green, sweet, tropical         |
| 2-phenylethyl acetate | 3.55 ± 0.03  | 3.08 ± 0.03  | 0.45 ± 0.02 | Floral, rose, sweet, honey, fruity, tropical, green                   |
| <b>Total Esters</b>   | <b>13.85</b> | <b>14.42</b> | <b>0.52</b> |                                                                       |

|                         |             |             |             |                                                                          |
|-------------------------|-------------|-------------|-------------|--------------------------------------------------------------------------|
| <b>Alcohols</b>         |             |             |             |                                                                          |
| (2R)-2-aminopropan-1-ol | 0.02 ± 0.01 | N.d.        | N.d.        |                                                                          |
| (Z,E)-farnesol          | N.d.        | 0.02 ± 0.01 | N.d.        | Delicate floral                                                          |
| 2-methylbutan-1-ol      | 0.84 ± 0.02 | 0.73 ± 0.02 | N.d.        | Roasted, winey, fruity, alcoholic                                        |
| 2-phenylethanol         | 0.24 ± 0.01 | 0.17 ± 0.03 | 7.36 ± 0.09 | Floral, rose, sweet, bready                                              |
| 3-methylbutan-1-ol      | 0.78 ± 0.02 | 0.68 ± 0.01 | N.d.        | Alcoholic, pungent, cognac, fruity, banana, molasses, fermented          |
| 4-aminopentan-1-ol      | 0.02 ± 0.01 |             | N.d.        |                                                                          |
| Pentan-1-ol             | 4.16 ± 0.03 | 3.61 ± 0.06 | N.d.        | Fusel, oily, sweet, balsamic, pungent, fermented, bready, cereal, fruity |
| Trans-farnesol          | 0.01 ± 0.01 | N.d.        | N.d.        | Muguet, floral, sweet, lily                                              |
| <b>Total Alcohols</b>   | <b>6.09</b> | <b>5.21</b> | <b>7.36</b> |                                                                          |

|                      |             |             |             |                                                                      |
|----------------------|-------------|-------------|-------------|----------------------------------------------------------------------|
| <b>Ketons</b>        |             |             |             |                                                                      |
| Methyl heptyl ketone | N.d.        | N.d.        | 0.19 ± 0.02 | Fruity, sweet, cheesy, herbal, coconut, fresh, green, dairy, buttery |
| 8-hydroxyoctan-2-one | N.d.        | N.d.        | 1.15 ± 0.02 |                                                                      |
| <b>Total Ketons</b>  | <b>N.d.</b> | <b>N.d.</b> | <b>1.35</b> |                                                                      |

|                            |             |             |             |                                                             |
|----------------------------|-------------|-------------|-------------|-------------------------------------------------------------|
| <b>Organic acids</b>       |             |             |             |                                                             |
| N-decanoic acid            | N.d.        | 0.02 ± 0.01 | N.d.        | Rancid, sour, fatty, citrus, creamy, buttery, fruity, dairy |
| <b>Total Organic acids</b> | <b>N.d.</b> | <b>0.02</b> | <b>N.d.</b> |                                                             |

|                        |             |             |             |  |
|------------------------|-------------|-------------|-------------|--|
| <b>Phenols</b>         |             |             |             |  |
| 2,5-ditert-butylphenol | N.d.        | N.d.        | 0.33 ± 0.01 |  |
| <b>Total Phenols</b>   | <b>N.d.</b> | <b>N.d.</b> | <b>0.33</b> |  |

| <b>Molecule</b>          | <b>ISC4 MATS</b> | <b>ISC4 PLANK</b> | <b>ISC4 BIOFILM-DETACHED</b> | <b>Odor and Flavor</b>                                                |
|--------------------------|------------------|-------------------|------------------------------|-----------------------------------------------------------------------|
| <b>Esters</b>            |                  |                   |                              |                                                                       |
| 2-methylbutyl acetate    | 0.14 ± 0.01      | 0.09 ± 0.01       | N.d.                         | Sweet, fruity, banana, tropical, juicy                                |
| 3-methylbutyl acetate    | 1.34 ± 0.02      | 1.07 ± 0.02       | N.d.                         | Sweet, fruity, banana                                                 |
| 3-methylbutyl propionate | N.d.             | 0.07 ± 0.03       | N.d.                         | Sweet, pineapple, tropical fruit, apple, banana, fresh green, melon   |
| Ethyl 9-decenoate        | N.d.             | 0.01 ± 0.01       | N.d.                         | Fruity fatty                                                          |
| Ethyl acetate            | 1.31 ± 0.03      | 2.00 ± 0.03       | N.d.                         | Fruity, sweet, weedy, green with a grape and cherry nuance            |
| Ethyl decanoate          | 4.45 ± 0.05      | 3.03 ± 0.05       | N.d.                         | Sweet, waxy, fruity, apple, grape, oily, brandy                       |
| Ethyl octanoate          | 0.27 ± 0.05      | 0.18 ± 0.02       | N.d.                         | Fruity, sweet, apricot, banana, pear, musty, pineapple, dairy, creamy |
| Phenethyl pivalate       | N.d.             | N.d.              | 0.63 ± 0.02                  | Rose, spicy, geranium, blueberry, balsamic, grassy                    |
| Phenethyl propionate     | 0.01 ± 0.01      | 0.01 ± 0.01       | N.d.                         | Floral, rose, fruity, honey, balsamic, green, sweet, tropical         |
| 2-phenylethyl acetate    | 7.92 ± 0.03      | 10.59 ± 0.09      | 0.41 ± 0.01                  | Floral, rose, sweet, honey, fruity, tropical, green                   |
| <b>Total Esters</b>      | <b>15.46</b>     | <b>17.09</b>      | <b>1.05</b>                  |                                                                       |

|                       |             |             |             |                                                                 |
|-----------------------|-------------|-------------|-------------|-----------------------------------------------------------------|
| <b>Alcohols</b>       |             |             |             |                                                                 |
| Trans-farnesol        |             | 0.01 ± 0.01 | N.d.        | Muguet, floral, sweet, lily                                     |
| 2-methylbutan-1-ol    | 1.96 ± 0.03 | 1.33 ± 0.03 | N.d.        | Roasted, winey, fruity, alcoholic                               |
| 2-phenylethanol       | 0.51 ± 0.01 | 0.17 ± 0.02 | 7.40 ± 0.09 | Floral, rose, sweet, bready                                     |
| 3-methylbutan-1-ol    | 1.83 ± 0.03 | 1.25 ± 0.06 | N.d.        | Alcoholic, pungent, cognac, fruity, banana, molasses, fermented |
| 4-aminopentan-1-ol    | 0.08 ± 0.01 | N.d.        | N.d.        |                                                                 |
| <b>Total Alcohols</b> | <b>4.38</b> | <b>2.78</b> | <b>7.40</b> |                                                                 |
| <b>Ketons</b>         |             |             |             |                                                                 |

|                                         |                   |                    |                               |                                                                          |
|-----------------------------------------|-------------------|--------------------|-------------------------------|--------------------------------------------------------------------------|
| Methyl heptyl ketone                    | N.d.              | N.d.               | 0.32 ± 0.01                   | Fruity, sweet, cheesy, herbal, coconut, fresh, green, dairy, buttery     |
| 8-hydroxyoctan-2-one                    | N.d.              | N.d.               | 0.01 ± 0.01                   |                                                                          |
| <b>Total Ketons</b>                     | <b>N.d.</b>       | <b>N.d.</b>        | <b>0.33</b>                   |                                                                          |
| <b>Organic acids</b>                    |                   |                    |                               |                                                                          |
| Acetic acid                             | N.d.              | 0.07 ± 0.01        | N.d.                          | Acidic, sharp, pungent, sour, vinegar, fruit overripe, fruit acetic      |
| <b>Total Organic acids</b>              | <b>N.d.</b>       | <b>0.07 ± 0.02</b> | <b>N.d.</b>                   |                                                                          |
| <b>Phenols</b>                          |                   |                    |                               |                                                                          |
| 2,5-ditert-butylphenol                  | N.d.              | N.d.               | 1.17 ± 0.03                   |                                                                          |
| <b>Total Phenols</b>                    | <b>N.d.</b>       | <b>N.d.</b>        | <b>1.17</b>                   |                                                                          |
| <b>Terpenes</b>                         |                   |                    |                               |                                                                          |
| α-springene                             | 0.03 ± 0.01       | N.d.               | N.d.                          |                                                                          |
| <b>Total Terpenes</b>                   | <b>0.03</b>       | <b>N.d.</b>        | <b>N.d.</b>                   |                                                                          |
| <b>Molecule</b>                         | <b>LM142 MATS</b> | <b>LM142 PLANK</b> | <b>LM142 BIOFILM-DETACHED</b> | <b>Odor and Flavor</b>                                                   |
| <b>Esters</b>                           |                   |                    |                               |                                                                          |
| 2-methylbutyl acetate                   | N.d.              | 0.05 ± 0.01        | N.d.                          | Sweet, fruity, banana, tropical, juicy                                   |
| 2-phenethyl butanoate                   | N.d.              | N.d.               | 7.25 ± 0.09                   |                                                                          |
| 3-methylbutyl acetate                   | 0.67 ± 0.01       | 0.64 ± 0.02        | N.d.                          | Sweet, fruity, banana                                                    |
| Ethyl acetate                           | 0.29 ± 0.01       | 0.88 ± 0.02        | N.d.                          | Fruity, sweet, weedy, green, with a grape and cherry nuance              |
| Ethyl decanoate                         | N.d.              | 1.81 ± 0.03        | N.d.                          | Sweet, waxy, fruity, apple, grape, oily, brandy                          |
| Ethyl octanoate                         | 0.11 ± 0.01       | 0.11 ± 0.01        | N.d.                          | Fruity, sweet, apricot, banana, pear, musty, pineapple, dairy, creamy    |
| Nerolidyl acetate                       | 0.01 ± 0.01       | N.d.               | N.d.                          | Fresh, sweet, citrus, freesia, woody                                     |
| Pentyl acetate                          | 9.22 ± 0.06       | 8.81 ± 0.09        | N.d.                          | Fruity, banana, pear, apple, sweet                                       |
| Phenethyl hexanoate                     | 0.13 ± 0.01       | N.d.               | N.d.                          | Sweet, honey, floral, woody, green, banana, pineapple                    |
| Phenethyl pivalate                      | N.d.              | 0.02 ± 0.01        | 0.33 ± 0.01                   | Rose, spicy, geranium, blueberry, balsamic, grassy                       |
| Phenethyl propionate                    | 0.01 ± 0.01       | N.d.               | N.d.                          | Floral, rose, fruity, honey, balsamic, green, sweet, tropical            |
| 2-phenylethyl acetate                   | 3.53 ± 0.06       | 2.00 ± 0.03        | 0.34 ± 0.03                   | Floral, rose, sweet, honey, fruity, tropical, green                      |
| <b>Total Esters</b>                     | <b>14.00</b>      | <b>14.35</b>       | <b>7.93</b>                   |                                                                          |
| <b>Alcohols</b>                         |                   |                    |                               |                                                                          |
| 2-methylbutan-1-ol                      | 0.83 ± 0.02       | 0.80 ± 0.02        | N.d.                          | Roasted, winey, fruity, alcoholic                                        |
| 2-phenylethanol                         | 0.19 ± 0.01       | 0.18 ± 0.01        | 3.98 ± 0.06                   | Floral, rose, sweet, bready                                              |
| 3-(2-methyl-1,3-dioxan-2-yl)propan-1-ol | N.d.              | N.d.               | 0.17 ± 0.02                   | Alcoholic, pungent, cognac, fruity, banana, molasses, fermented          |
| 3-methylbutan-1-ol                      | 0.67 ± 0.02       | 0.64 ± 0.02        | N.d.                          |                                                                          |
| 4-aminopentan-1-ol                      | 0.01 ± 0.01       | N.d.               | N.d.                          |                                                                          |
| 4-butoxybutan-1-ol                      | N.d.              | N.d.               | 0.11 ± 0.01                   |                                                                          |
| 8-methylnonane-1,8-diol                 | N.d.              | N.d.               | 0.32 ± 0.01                   |                                                                          |
| Pentan-1-ol                             | 4.14 ± 0.06       | 3.95 ± 0.03        | N.d.                          | Fusel, oily, sweet, balsamic, pungent, fermented, bready, cereal, fruity |
| Piperidin-3-ol                          | N.d.              | 0.02 ± 0.01        | N.d.                          | Muguet, floral, sweet, lily                                              |
| Trans-farnesol                          | 0.01 ± 0.01       | N.d.               | N.d.                          |                                                                          |
| <b>Total Alcohols</b>                   | <b>5.88</b>       | <b>5.60</b>        | <b>4.60</b>                   |                                                                          |
| <b>Ketons</b>                           |                   |                    |                               |                                                                          |
| Methyl heptyl ketone                    | N.d.              | N.d.               | 0.17 ± 0.01                   | Fruity, sweet, cheesy, herbal, coconut, fresh, green, dairy, buttery     |
| 8-hydroxyoctan-2-one                    | N.d.              | N.d.               | 0.33 ± 0.01                   |                                                                          |
| <b>Total Ketons</b>                     | <b>N.d.</b>       | <b>N.d.</b>        | <b>0.51</b>                   |                                                                          |
| <b>Phenols</b>                          |                   |                    |                               |                                                                          |
| 2,5-ditert-butylphenol                  | N.d.              | N.d.               | 0.65 ± 0.02                   |                                                                          |
| <b>Total Phenols</b>                    | <b>N.d.</b>       | <b>N.d.</b>        | <b>0.65</b>                   |                                                                          |
| <b>Terpenes</b>                         |                   |                    |                               |                                                                          |
| β-springene                             | 0.02 ± 0.01       | N.d.               | 0.55 ± 0.01                   |                                                                          |

|                                      |                 |                  |                             |                                                                              |
|--------------------------------------|-----------------|------------------|-----------------------------|------------------------------------------------------------------------------|
| <b>Total Terpenes</b>                | <b>0.02</b>     | <b>N.d.</b>      | <b>0.55 ±</b>               |                                                                              |
| <b>Molecule</b>                      | <b>M83 MATS</b> | <b>M83 PLANK</b> | <b>M83 BIOFILM-DETACHED</b> | <b>Odor and Flavor</b>                                                       |
| <b>Esters</b>                        |                 |                  |                             |                                                                              |
| Ethyl acetate                        | 1.71 ± 0.01     | 0.67 ± 0.01      | N.d.                        | Fruity, sweet, weedy, green, with a grape and cherry nuance                  |
| 2-phenylethyl acetate                | 9.76 ± 0.03     | 3.64 ± 0.06      | 5.46 ± 0.06                 | Floral, rose, sweet, honey, fruity, tropical, green                          |
| 3-methylbutyl acetate                | 0.27 ± 0.01     | 0.11 ± 0.01      | N.d.                        | Sweet, fruity, banana                                                        |
| Pentyl acetate                       | 3.57 ± 0.06     | 9.49 ± 0.06      | N.d.                        | Fruity, banana, pear, apple, sweet                                           |
| Ethyl pyruvate                       | 0.10 ± 0.01     | N.d.             | N.d.                        | Fruity, sweet, sharp, vegetable, caramelly, ethereal                         |
| Ethyl decanoate                      | 0.73 ± 0.03     | 1.95 ± 0.01      | N.d.                        | Sweet, waxy, fruity, apple, grape, oily, brandy                              |
| Ethyl octanoate                      | 0.04 ± 0.01     | N.d.             | N.d.                        | Fruity, sweet, apricot, banana, pear, musty, pineapple, dairy, creamy, fatty |
| Nerolidyl acetate                    | 0.08 ± 0.01     | N.d.             | N.d.                        | Fresh, sweet, citrus, freesia, woody                                         |
| Isopropyl hexadecanoate              | 0.11 ± 0.01     | N.d.             | N.d.                        | Oily                                                                         |
| Phenethyl pivalate                   | N.d.            | 0.02 ± 0.01      | 0.42 ± 0.01                 | Rose, spicy, geranium, blueberry, balsamic, grassy                           |
| <b>Total Esters</b>                  | <b>16.41</b>    | <b>15.90</b>     | <b>5.88</b>                 |                                                                              |
| <b>Alcohols</b>                      |                 |                  |                             |                                                                              |
| (2R)-2-aminopropan-1-ol              | 0.06 ± 0.01     | 0.02 ± 0.01      | N.d.                        |                                                                              |
| 3-methylbutan-1-ol                   | 0.26 ± 0.02     | 0.69 ± 0.02      | N.d.                        | Alcoholic, pungent, cognac, fruity, banana, molasses, fermented              |
| 2-methylbutan-1-ol                   | 0.32 ± 0.03     | 0.30 ± 0.01      | N.d.                        | Roasted, winey, fruity, alcoholic                                            |
| Pentan-1-ol                          | 1.60 ± 0.01     | 4.26 ± 0.03      | N.d.                        | Fusel, oily, sweet, balsamic, pungent, fermented, bready, cereal, fruity     |
| 2-phenylethanol                      | 0.50 ± 0.01     | 0.14 ± 0.01      | 7.70 ± 0.09                 | Floral, rose, sweet, bready                                                  |
| 1-aminopropan-2-ol                   | N.d.            | 0.03 ± 0.01      | N.d.                        | Fishy, ammonia like                                                          |
| 4-aminopentan-1-ol                   | N.d.            | 0.02 ± 0.01      | N.d.                        |                                                                              |
| 4-butoxybutan-1-ol                   | N.d.            | N.d.             | 0.18 ± 0.01                 |                                                                              |
| <b>Total Alcohols</b>                | <b>2.76</b>     | <b>5.48</b>      | <b>7.88</b>                 |                                                                              |
| <b>Ketons</b>                        |                 |                  |                             |                                                                              |
| Methyl heptyl ketone                 | N.d.            | N.d.             | 0.22 ± 0.01                 | Fruity, sweet, cheesy, herbal, coconut, fresh, green, dairy, buttery         |
| 8-hydroxyoctan-2-one                 | N.d.            | N.d.             | 0.38 ± 0.02                 |                                                                              |
| <b>Total Ketons</b>                  | <b>N.d.</b>     | <b>N.d.</b>      | <b>0.60</b>                 |                                                                              |
| <b>Lactones</b>                      |                 |                  |                             |                                                                              |
| D-galactonic acid, $\gamma$ -lactone | 0.04 ± 0.01     | N.d.             | N.d.                        |                                                                              |
| <b>Total Lactones</b>                | <b>0.04</b>     | <b>N.d.</b>      | <b>N.d.</b>                 |                                                                              |
| <b>Organic acids</b>                 |                 |                  |                             |                                                                              |
| Acetic acid                          | N.d.            | 0.12 ± 0.01      | N.d.                        | Acidic, sharp, pungent, sour, vinegar, fruit overripe, fruit acetic          |
| N-decanoic acid                      | N.d.            | 0.02 ± 0.01      | N.d.                        | Rancid, sour, fatty, citrus, creamy, buttery, fruity, dairy                  |
| <b>TOT Organic acids</b>             | <b>N.d.</b>     | <b>0.14</b>      | <b>N.d.</b>                 |                                                                              |
| <b>Phenols</b>                       |                 |                  |                             |                                                                              |
| 2,5-ditert-butylphenol               | N.d.            | N.d.             | 0.36 ± 0.01                 |                                                                              |
| <b>Total Phenols</b>                 | <b>N.d.</b>     | <b>N.d.</b>      | <b>0.36</b>                 |                                                                              |
